# Supplementary material
Source: PubMed Central journal article supplement (PMC6295910)
Supplement: NIHMS933453-supplement-Supplemental.pdf [file NIHMS933453-supplement-Supplemental.pdf]

## Supplementary Information

Automated cassette-based production of high specific activity [ $^{203/212}\text{Pb}$ ]peptide-based theranostic radiopharmaceuticals for image-guided radionuclide therapy for cancer.

Mengshi Li<sup>a</sup>, Xiuli Zhang<sup>b</sup>, Thomas P. Quinn<sup>b</sup>, Dongyoul Lee<sup>a</sup>, Dijie Liu<sup>c</sup>, Falk Kunkel<sup>d</sup>, Brian E. Zimmerman<sup>e</sup>, Daniel McAlister<sup>f</sup>, Keith Olewein<sup>g</sup>, Yusuf Menda<sup>h</sup>; Saed Mirzadeh<sup>i</sup>; Roy Copping<sup>i</sup>; Frances L. Johnson<sup>j,k</sup>, Michael K. Schultz<sup>\*a,c,h,j,l,m</sup>

<sup>a</sup>Interdisciplinary Graduate Program in Human Toxicology, University of Iowa, Iowa City, IA, USA; <sup>b</sup>Department of Biochemistry, University of Missouri, Columbia, MO USA; <sup>c</sup>Stead Family Department of Pediatrics, University of Iowa, Iowa City, IA, USA; <sup>d</sup>Eckert & Ziegler Radiopharma GmbH, Berlin, Germany; <sup>e</sup>National Institute of Standards and Technology, Gaithersburg, MD USA; <sup>f</sup>Eichrom Technologies, LLC, Lisle, IL USA; <sup>g</sup>Lantheus Medical Imaging, North Billerica MA USA; <sup>h</sup>Department of Radiology, The University of Iowa, Iowa City, IA, USA; <sup>i</sup>Oak Ridge National Laboratory, The US Department of Energy, Oak Ridge TN USA; <sup>j</sup>Viewpoint Molecular Targeting, LLC (Coralville, IA); <sup>k</sup>Department of Internal Medicine, Carver College of Medicine, University of Iowa, Iowa City, Iowa USA; <sup>l</sup>Department of Radiation Oncology (Free Radical and Radiation Biology Program), Carver College of Medicine, University of Iowa, Iowa City, IA USA; <sup>m</sup>Department of Chemistry, University of Iowa, Iowa City, IA, USA.

**Running Title:** Efficient automated synthesis of  $^{203/212}\text{Pb}$  bioconjugates

**\*Corresponding Author:** Michael K. Schultz PhD, Associate Professor; Departments of Radiology, Radiation Oncology, Chemistry, and Pediatrics, The University of Iowa, ML B180 FRRBP, 500 Newton Road, Iowa City, IA 52240, Phone +1 (319) 335-8017; Email [michael-schultz@uiowa.edu](mailto:michael-schultz@uiowa.edu).

**First Author:** Mengshi Li MS. Graduate Researcher (PhD). Interdisciplinary Program in Human Toxicology, ML B180 FRRB, 500 Newton Road, Iowa City, IA 52240, Phone +1 (319) 383-5080, Email [mengshi-li@uiowa.edu](mailto:mengshi-li@uiowa.edu).

## Nuclear and Decay Data

Half lives and all nuclear data (decay energies and branching ratios) were obtained from the National Nuclear Data Center, Brookhaven National Laboratory, and are based on the Evaluated Nuclear Structure Data File available through [www.nndc.bnl.gov](http://www.nndc.bnl.gov).

## Cyclotron Production of $^{203}\text{Pb}$

**Reactions:**  $^{203}\text{Pb}$  for the current studies was produced on Lantheus cyclotrons using natural Tl ( $^{\text{nat}}\text{Tl}$ ) targets at an approximate beam energy of 26.5MeV. There are two naturally occurring stable isotopes of Tl (Tl-203;  $^{203}\text{Tl}$  and Tl-205  $^{205}\text{Tl}$ ), with abundances of ~29.5% and ~70.5% respectively.

The primary reaction of interest in the manufacture of  $^{203}\text{Pb}$  is:

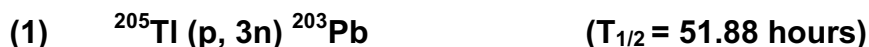

While co-produced stable metals can be removed easily *via* the pre-concentration step described herein, co-production of stable Pb isotopes must be controlled as excess stable Pb is an interference to the radiolabeling and ultimate specific activity of the radiopharmaceuticals prepared. Along these lines, important reactions to consider in the production  $^{203}\text{Pb}$  for radiopharmaceuticals include:

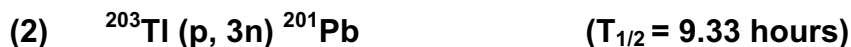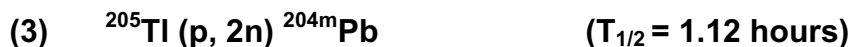

Each of these Pb isotopes decays by electron capture (**ec**) or internal transition (**it**) to its corresponding Pb) or Tl isotope according the following schemes:

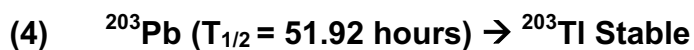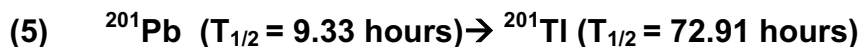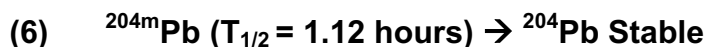

$^{201}\text{Pb}$  produced *via* (2) is the primary radio-contaminant; and a hold time to allow for decay (approximately 90 h) is used to allow decay of Pb-201 (5).  $^{204\text{m}}\text{Pb}$  (3, 6) is the primary metallic contaminant produced on the cyclotron and leads to the production of a small quantity of stable  $^{204}\text{Pb}$ ; and the relationship of  $^{203}\text{Pb}$  production to co-production of  $^{204\text{m}}\text{Pb}$  is under evaluation for a future publication.

**Targetry and Purification:** Highly pure  $^{\text{nat}}\text{Tl}$  (>99.99%) is purchased as thallium nitrate (Alfa-Aesar). The nitrate is dissolved using pure water. Plating additives (proprietary) are added to the dissolved Tl to create the plating bath. The solution is transferred into the plating cell. The Cu cyclotron target is serially numbered and flashed with Ni prior to Tl plating. The target is plated uninterrupted until bath depletion. The target is removed from the bath, dried, visually inspected and weighed. Acceptable target masses are 2.5-9 grams with no visual damage or voids.  $^{\text{nat}}\text{Tl}$  target irradiations are performed on an Cyclone 30 (IBA RadioPharma Solutions) or C-28 Cyclotron (Cyclotron Inc.) for 6-24 h. The irradiated targets are transferred to high energy processing cells and held for approximately 90 hours to allow decay of  $^{201}\text{Pb}$  (5). The Tl metal target material is then dissolved from the cyclotron target using hot 1M  $\text{HNO}_3$ . The solution is filtered through a glass wool column and pH adjusted using concentrated  $\text{NH}_4\text{OH}$  and/or 1 M  $\text{HNO}_3$  to a final value between pH 5-6. The adjusted solution is passed through a Chelex 100 (Bio Rad) ion exchange column (14 mL resin bed, ammonium form) and washed with 150-175 mL of 1 M  $\text{NH}_4\text{NO}_3$  to remove residual Tl metal. Cu, Ni, Fe, Zn and  $^{203}\text{Pb}$  are retained on the column. The  $^{203}\text{Pb}$  is removed from the column using ~75 mL of hot (~85°C) 0.5 M  $\text{NH}_4\text{OH}$ . The  $^{203}\text{Pb}$  hydroxide solution is pH adjusted between 5-6 using 1

M HNO<sub>3</sub> and/or concentrated NH<sub>4</sub>OH to a final value between pH 5 and pH 6. The adjusted solution is loaded onto a second Chelex 100 column. The column is washed with 150-175 mL of 1 M NaNO<sub>3</sub>. The <sup>203</sup>Pb is removed from the column using ~75 mL of hot (~85°C) 0.5 M NaOH. The <sup>203</sup>Pb hydroxide solution is pH adjusted approximately 5-6 using 1 M HNO<sub>3</sub> and/or concentrated NH<sub>4</sub>OH to a final value between pH 5.6. The column is washed with 150-175 mL of 1 M NH<sub>4</sub>NO<sub>3</sub> followed by a 60 mL of pure water. The <sup>203</sup>Pb is then stripped from the column with 10-20 mL increments of 1 M HNO<sub>3</sub> until the <sup>203</sup>Pb is removed from the column. The <sup>203</sup>Pb strip solution is reduced to dryness in a beaker on a hotplate. Approximately 10 mL in 2-3 mL increments of 0.5 M HCl is used to remove the <sup>203</sup>Pb activity from the beaker and the stock is transferred to a 10 mL vial for final assay by dose calibrator (Capintec) to determine concentration according to the manufacturer's instructions.

**Analytical Testing/Quality Control:** Two samples for analytical testing are prepared from the assayed stock solution. The first sample is a serially diluted sample containing approximately 370 kBq of <sup>203</sup>Pb is analyzed on NIST traceable high purity germanium detector (HPGe) (Canberra) for radio-nuclidic identification and purity. The other sample is prepared for inductively coupled plasma analysis (ICP-OES) (Varian) for trace metal and specific activity determination.

## **Radiochemical purity and HPLC isolation of radiopeptides from unlabeled precursors.**

Instant thin layer chromatography (iTLC) imaging was also applied to confirm the achievable radiolabeling efficiency and radiochemical purity. For  $^{212}\text{Pb}$  analysis, 2  $\mu\text{l}$  of  $^{212}\text{Pb}$  labeled peptide and free  $^{212}\text{Pb}^{2+}$  positive control was spotted on the iTLC strip (10cm $\times$ 2cm) that was dried at 90°C for at least 2h before using. The sample strips were developed in the mobile phase 0.2M NaOAc with 20mM EDTA. After overnight equilibration, the strips were analyzed with a Typhoon FLA7000 phosphor-imager. The radiochemical purity was calculated by integrating the radioactivity counts at the solvent front ( $R_f=1$ ) and comparing to the integrated counts at the origin ( $R_f=0$ ). Radio-HPLC was used to determine radiochemical purity of  $^{203/212}\text{Pb}$  labeled peptides using HPLC: Agilent 1200 Series; Radioactivity detector: IN/US system  $\beta$ -RAM Model 4, using a linear 16%-26% acetonitrile gradient in 20mM HCl over 20 minutes on a Vydac 218TP C18 column (4.6 $\times$ 150mm, 5 $\mu\text{m}$ ) with 1mL min $^{-1}$  flow rate. By using the same radio-HPLC gradient, both radiolabeled peptides (*i.e.*, DOTATOC and DOTA-PEG4-VMT-MCR1) were separated from excess unlabeled peptide to enhance the specific activity of final product. This separation was verified by co-injecting [ $^{203}\text{Pb}$ ]peptide with 10 $\mu\text{g}$  bulk unlabeled peptide and monitoring both UV and radio-detector traces. Theoretical specific activity was calculated as follows: The amount of purified radio-peptide from HPLC collection was estimated from measured radioactivity and  $\lambda$  for Pb-203. Stable Pb isotope impurity was referred from QC technical data sheet from manufacture. Final

specific activity was calculated by  $A/([^{203}\text{Pb} + \text{stable Pb}] \text{peptide})$  and is expressed as MBq/nmol).

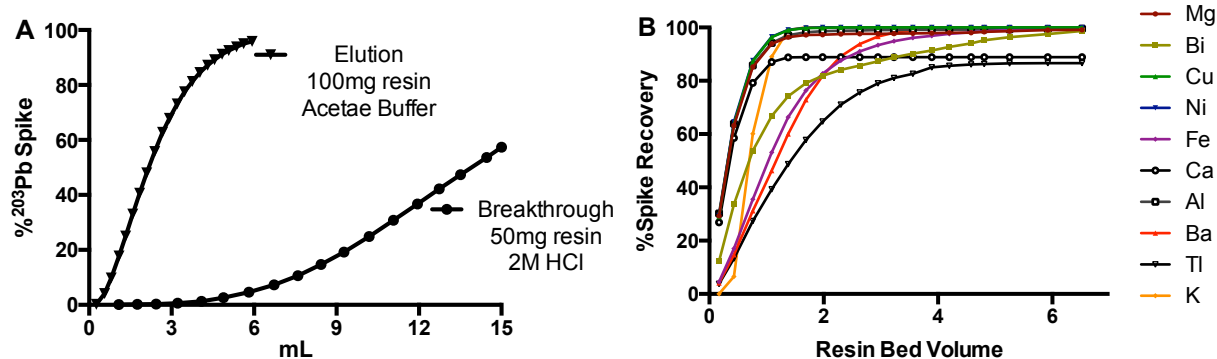

**Figure S1.** Elution and breakthrough of (A) Pb (as  $^{203}\text{Pb}$ ); and (B) metallic interferences. A smaller (50 mg) resin bed was used to find breakthrough volumes; and 100 mg resin bed was used to understand the elution behavior. These figures suggest 5 mL of HCl load/rinse solution can be passed over the column before breakthrough of Pb would occur; Similarly, 5 mL of NaOAc buffer is sufficient to elute 100% of the Pb. Metal interferences can be removed with a 2-column-volume rinse. Solutions were collected dropwise and counted by gamma counter.

**Table S1.** Mass spectroscopy analysis of  $^{224}\text{Ra}/^{212}\text{Pb}$  generator eluate before and after Pb-resin purification.

| Metal | Before Pb-resin ( $\mu\text{g}$ ) | After Pb-resin ( $\mu\text{g}$ ) |
|-------|-----------------------------------|----------------------------------|
| Cu    | 0.3                               | 0.2                              |
| Fe    | 46.2                              | 0.74                             |
| Pb    | 1.74                              | 1.7                              |
| Se    | 0.42                              | 0.2                              |
